# Supplementary material for: Convergent biological pathways underlying the Kallmann syndrome-linked genes Hs6st1 and Fgfr1
Source: PubMed Central journal article supplement (PMC9759331; doi:10.1093/hmg/ddac172), 2022-07-28
Supplement: figure_supple_revise_ddac172.pdf [file figure_supple_revise_ddac172.pdf]

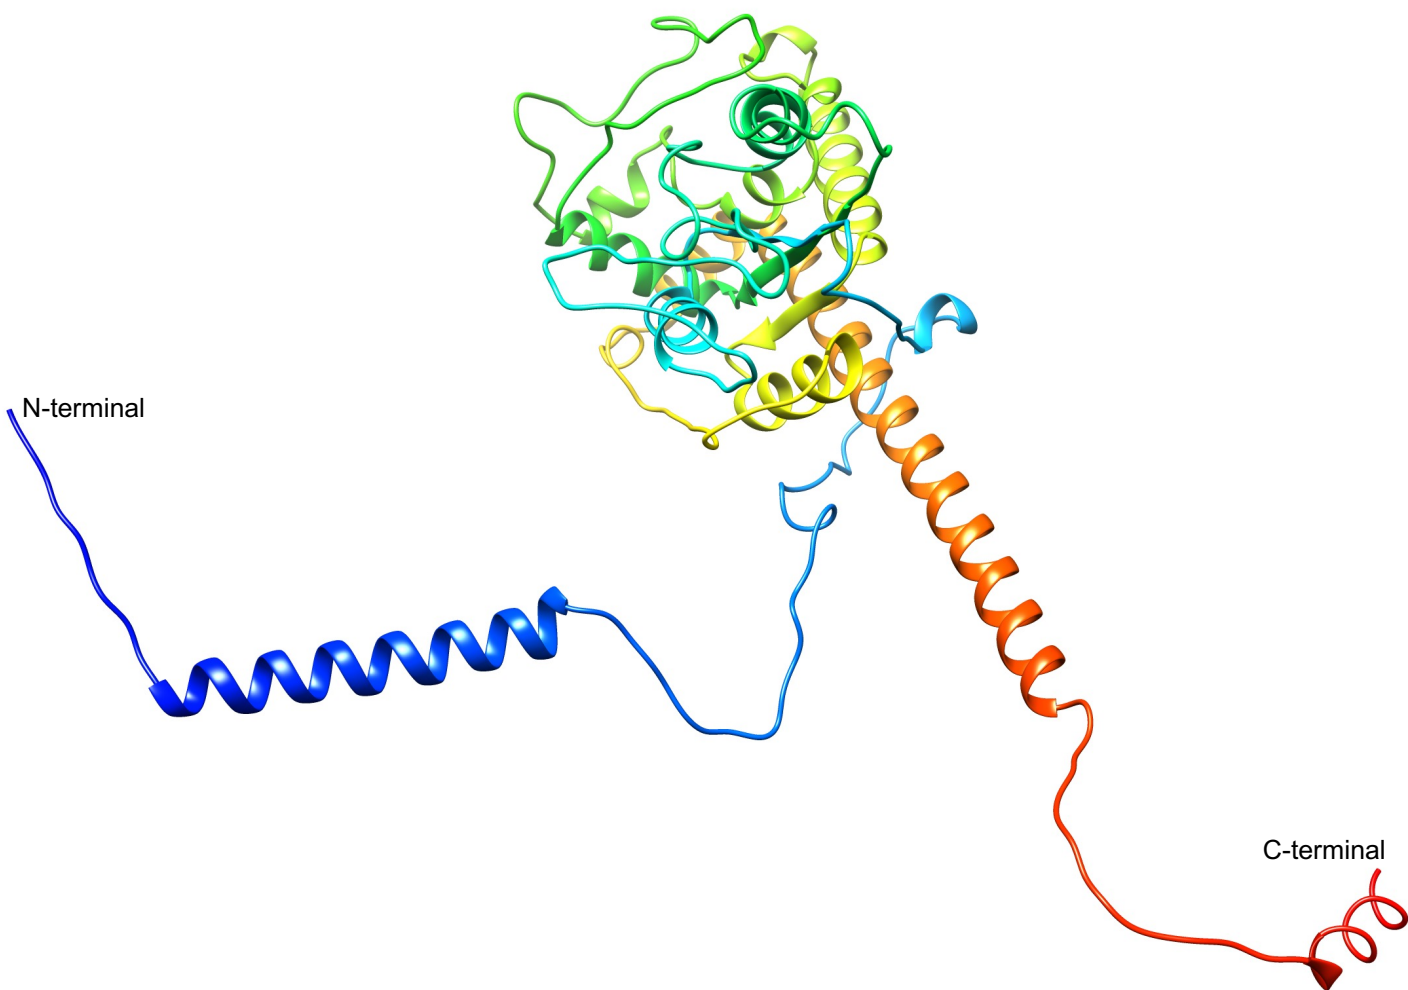

|              |                                            |                                      |                            |                         |                   |
|--------------|--------------------------------------------|--------------------------------------|----------------------------|-------------------------|-------------------|
|              |                                            | <b>α1</b>                            |                            | <b>α2</b>               |                   |
| <b>Human</b> | MRRRRAGGR                                  | MVERASKFVLVVAGS                      | VCFMLILYQYAGPGLSLGAPGGR    | APPDDLDFPTDP            | PHYEKKYYFPVREL 75 |
| <b>Mouse</b> | MRRRRAGGR                                  | MVERASKFVLVVAGS                      | ACFMLILYQYAGPGLSLGAPGGR    | VPPDDLDFPTDP            | PHYEKKYYFPVREL 75 |
|              |                                            | <b>β1</b>                            | <b>α3</b>                  |                         |                   |
| <b>Human</b> | ERSLRFD                                    | MKGGDDVIVFLHIQKTGGTTFGRHLVQNVRL      | EVPCDCRPGQKKCTCYRPNRRETWLF | SRFSTGW                 | SCGLH 150         |
| <b>Mouse</b> | ERSLRFD                                    | MKGGDDVIVFLHIQKTGGTTFGRHLVQNVRL      | EVPCDCRPGQKKCTCYRPNRRETWLF | SRFSTGW                 | SCGLH 150         |
|              | <b>α4</b>                                  |                                      | <b>β2</b>                  | <b>α5</b>               |                   |
| <b>Human</b> | ADWTELTNCVPGVLD                            | RRRSAAALRTPRKFFYYITLLRDPVSRYLSEWRHVQ | RGATWKTS                   | SLHMCDGRTPTPEELPPCY 225 |                   |
| <b>Mouse</b> | ADWTELTNCVPGVLD                            | RRRSPAGLRSPRKFFYYITLLRDPVSRYLSEWRHVQ | RGATWKTS                   | SLHMCDGRTPTPEELPPCY 225 |                   |
|              | <b>α6</b>                                  | <b>α7</b>                            | <b>α8</b>                  | <b>β3</b>               | <b>α9</b>         |
| <b>Human</b> | EGTDWSGCTLQEFMDCPYNLANNRQVRMLADLSLVGCYNLSF | IPEGKRAQLLLES                        | SAKKNLRGMAFFGLTEFQ         | RKT 300                 |                   |
| <b>Mouse</b> | EGTDWSGCTLQEFMDCPYNLANNRQVRMLADLSLVGCYNLSF | IPESKRAQLLLES                        | SAKKNLRGMAFFGLTEFQ         | RKT 300                 |                   |
|              |                                            | <b>α10</b>                           | <b>α11</b>                 |                         |                   |
| <b>Human</b> | QYLFERTFNLKFIRPFMQYNSTRAGGVEVDEDTIR        | RIEELNDLDMQLDYAKDLFQORYQYKRQLERREQRL | RSR 375                    |                         |                   |
| <b>Mouse</b> | QYLFERTFNLKFIRPFMQYNSTRAGGVEVDEDTIR        | HIEELNDLDMQLDYAKDLFQORYQYKRQLERREQRL | RNR 375                    |                         |                   |
| <b>Human</b> | EERLLHRAKEALPRED                           | ADEPGRVPTEDYMSHIIEKW 411             |                            |                         |                   |
| <b>Mouse</b> | EERLLHRSKEALPRED                           | PEEPGRVPTEDYMSHIIEKW 411             |                            |                         |                   |

**Supplemental Figure S1.** Protein structure of the human HS6ST1 predicted by the AlphaFold.  $\alpha$ ,  $\alpha$ -helix.  $\beta$ ,  $\beta$ -strand.

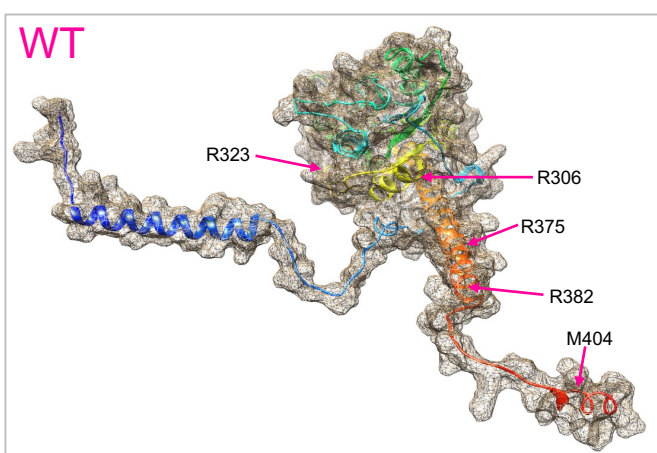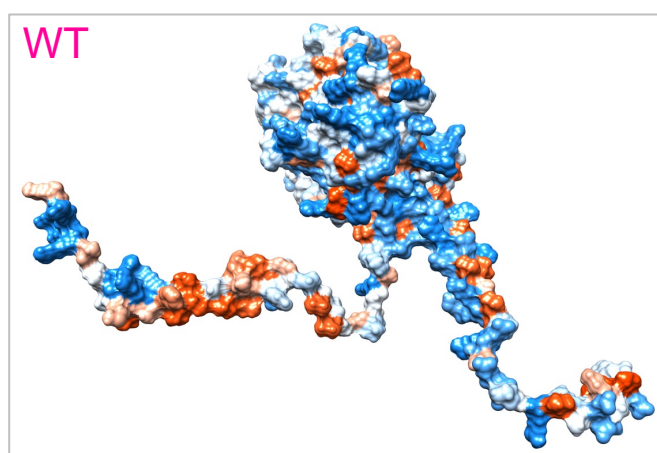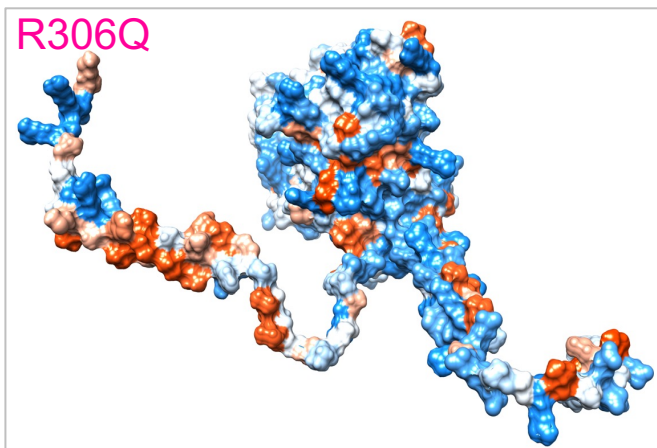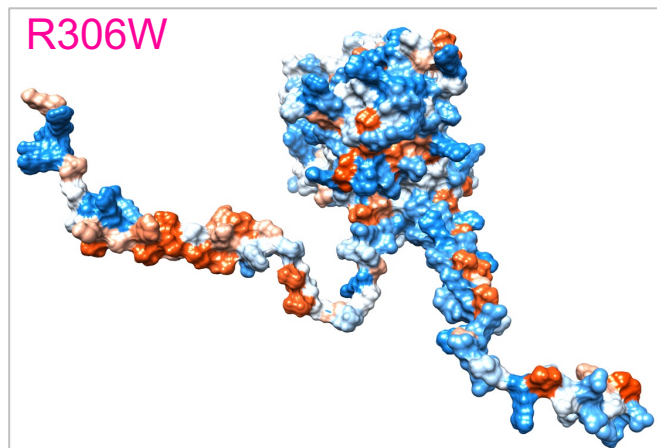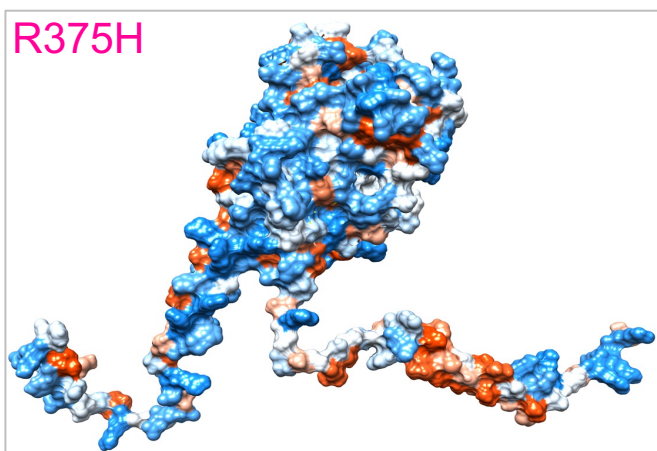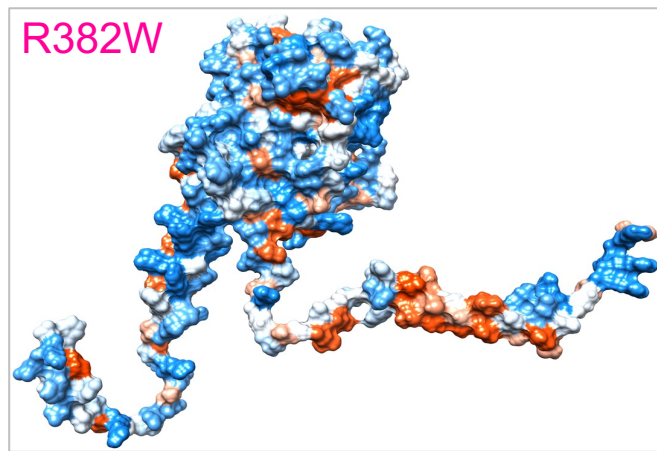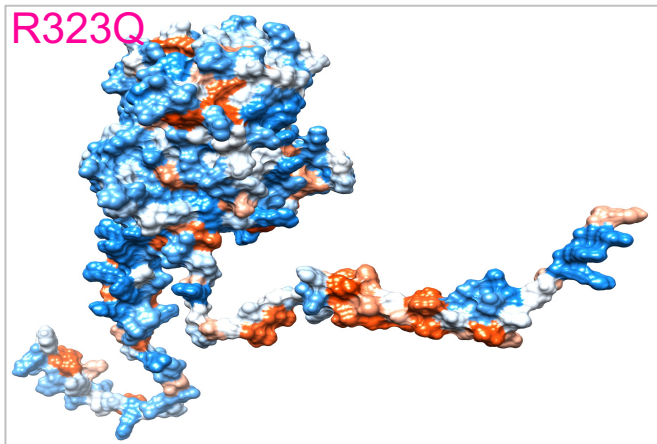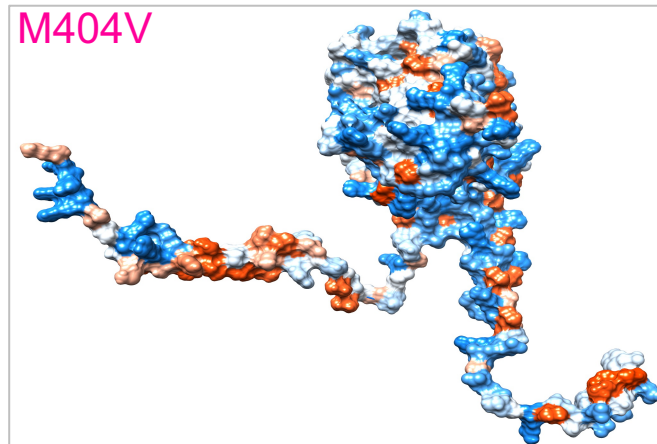

**Supplemental Figure S2.** Protein structures of the WT and mutant human HS6ST1 predicted by the AlphaFold.

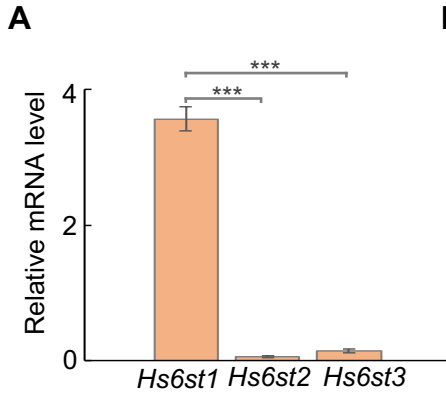

**B**

|                      | Total read pairs | Uniquely mapped read pairs |
|----------------------|------------------|----------------------------|
| Ctrl replicate 1     | 88,036,346       | 76,381,000 (86.76%)        |
| Ctrl replicate 2     | 54,384,194       | 46,598,448 (85.68%)        |
| Ctrl replicate 3     | 40,630,458       | 34,720,575 (85.45%)        |
| siHs6st1 replicate 1 | 22,058,825       | 19,032,190 (86.28%)        |
| siHs6st1 replicate 2 | 30,229,727       | 26,121,458 (86.41%)        |
| siHs6st1 replicate 3 | 23,244,310       | 20,113,225 (86.53%)        |
| siFgfr1 replicate 1  | 26,938,712       | 23,214,144 (86.17%)        |
| siFgfr1 replicate 2  | 20,623,653       | 18,224,942 (88.37%)        |
| siFgfr1 replicate 3  | 39,069,745       | 33,166,410 (84.89%)        |
| siFgfr1 replicate 4  | 156,060,365      | 135,088,193 (86.56%)       |

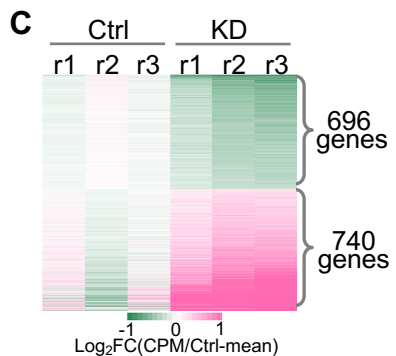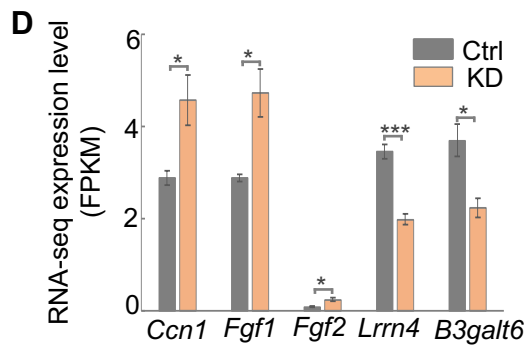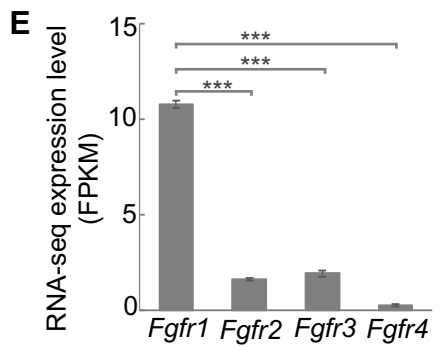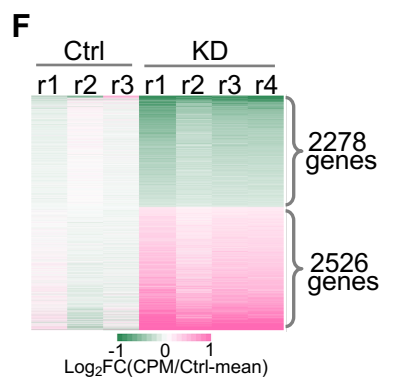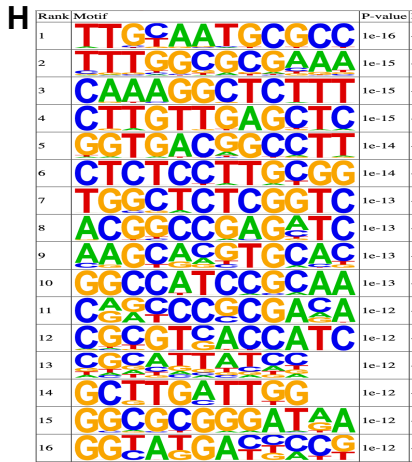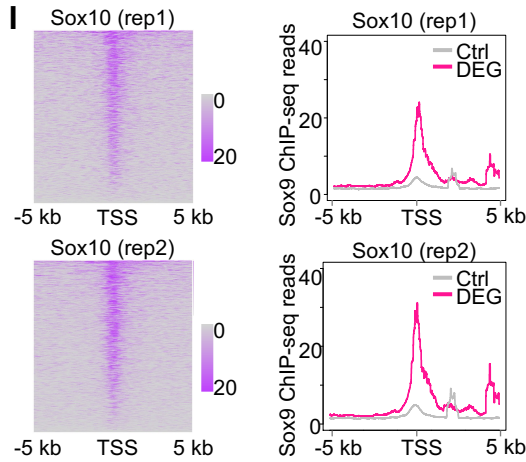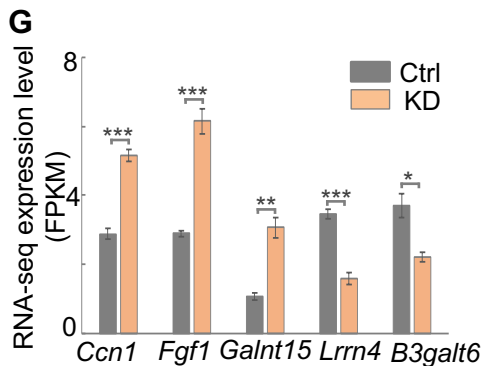

**J**

|        |         |        |        |
|--------|---------|--------|--------|
| ANOS1  | HS6ST1  | FGFR1  | SOX10  |
| CHD7   | FGF8    | FGF17  | OL14RD |
| HESX1  | FEZF1   | PROK2  | GNRHR  |
| SOX3   | SEMA3A  | PROKR2 | AXL    |
| SEMA7A | WDR11   | NSMF   | LHX4   |
| GNRH1  | GLI2    | SEMA3E | PLXNA1 |
| IL17RD | DUSP6   | SPRY4  | FLRT3  |
| KLB    | DCC     | NTN1   | IGSF10 |
| TUBB3  | CCDC141 |        |        |

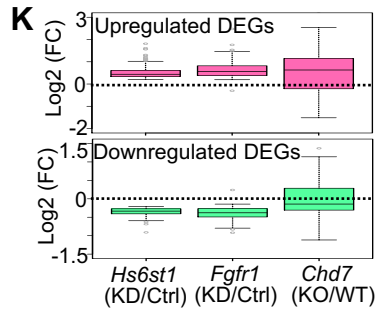

**Supplemental Figure S3.** siRNA knockdown (KD) of Hs6st1 (siHs6st1) and Fgfr1 (siFgfr1) in Neuro 2a cells followed by RNA sequencing (RNA-seq). **A**, qPCR results of the expression levels of the three *Hs6st* genes in Neuro 2a cells. **B**, Statistics of the sequencing and mapping of the RNA-seq data. **C**, Heatmap of the fold changes of the differentially expressed genes upon *Hs6st1* knockdown (KD). r1, biological replicate 1. **D**, RNA-seq expression levels of five genes in the control (Ctrl) and *Hs6st1* knockdown (KD). **E**, RNA-seq expression levels of the four *Fgfr* genes in Neuro 2a cells. **F**, Heatmap of the fold changes of the differentially expressed genes upon *Fgfr1* knockdown (KD). **G**, RNA-seq expression levels of five genes in the control (Ctrl) and *Fgfr1* knockdown (KD). **H**, The identified *de novo* motifs by Homer. **I**, Heatmaps and line plots showing the Sox10 ChIP-seq signals at the promoter regions. **J**, The thirty-four Kallmann syndrome-linked genes. \*, *P*-value < 0.05; \*\*, *P*-value < 0.01; \*\*\*, *P*-value < 0.001; one-tailed t-test. **K**, The expression changes (log<sub>2</sub>FC) of overlapping DEGs in *Hs6st1* KD, *Fgf1* KD, and *Chd7* knockout (KO).
